# Supplementary material
Source: ML conference proceedings conference paper supplement (https://openaccess.thecvf.com/content/CVPR2026/html/Anisha_Generative_Adversarial_Perturbations_CVPR_2026_paper.html)
Supplement: Supplementary file 1 [file Anisha_Generative_Adversarial_Perturbations_CVPR_2026_supplemental.pdf]

## Attack Generalization of the Generator

We demonstrate that our generator  $G_\theta$  can generalize the attack across the dataset in Table 1 and 2. Table 1 shows the performance of the attack if generator is trained on SHHA and tested on UCF-QNRF, and table 2 shows the case trained on UCF-QNRF and tested on SHHA.

Table 1: Transferability of our designed adversarial examples across crowd counting models on UCF-QNRF dataset, where  $G_\theta$  was trained on SHHA

| Source Model | Target Model |        |        |        |        |        |            |
|--------------|--------------|--------|--------|--------|--------|--------|------------|
|              | SASNet       | P2PNet | FIDTM  | PET    | HMoDE  | APGCC  | Gramformer |
| SASNet       | 620.13       | 819.79 | 741.86 | 756.81 | 572.13 | 808.23 | 613.94     |
| P2PNet       | 606.15       | 657.84 | 622.34 | 676.95 | 429.78 | 673.17 | 518.40     |
| FIDTM        | 639.64       | 833.09 | 767.54 | 766.21 | 530.23 | 819.93 | 647.01     |
| PET          | 630.66       | 830.98 | 751.50 | 761.65 | 526.67 | 808.33 | 622.28     |
| HMoDE        | 619.76       | 820.67 | 741.68 | 757.75 | 528.11 | 807.53 | 613.05     |
| APGCC        | 659.61       | 840.08 | 765.43 | 786.79 | 561.54 | 816.36 | 637.51     |
| Gramformer   | 617.21       | 819.49 | 736.08 | 761.39 | 524.83 | 806.27 | 609.38     |
| Clean        | 326.94       | 324.73 | 279.08 | 393.19 | 339.02 | 288.12 | 290.44     |

Table 2: Transferability of our designed adversarial examples across crowd counting models on SHHA dataset, where  $G_\theta$  was trained on UCF-QNRF

| Source Model | Target Model |        |        |        |        |        |            |
|--------------|--------------|--------|--------|--------|--------|--------|------------|
|              | SASNet       | P2PNet | FIDTM  | PET    | HMoDE  | APGCC  | Gramformer |
| SASNet       | 300.72       | 420.65 | 338.49 | 293.55 | 250.26 | 399.21 | 257.62     |
| P2PNet       | 262.40       | 296.66 | 259.92 | 230.87 | 171.15 | 308.70 | 200.62     |
| FIDTM        | 300.92       | 421.37 | 338.45 | 293.33 | 249.61 | 398.67 | 257.68     |
| PET          | 305.91       | 426.73 | 345.73 | 299.04 | 251.48 | 405.39 | 262.66     |
| HMoDE        | 300.89       | 420.34 | 338.98 | 293.14 | 249.70 | 398.38 | 257.52     |
| APGCC        | 308.81       | 422.38 | 339.53 | 294.61 | 251.20 | 353.59 | 259.73     |
| Gramformer   | 300.64       | 420.63 | 339.05 | 292.36 | 250.11 | 398.36 | 257.63     |
| Clean        | 36.98        | 46.12  | 28.10  | 70.21  | 74.80  | 56.55  | 29.91      |

## Benchmark Performance on UCF-QNRF

We additionally compute the performance of our proposed method with state-of-the-art benchmark methods in Table 3. We observe that we have achieved the balance between higher overall PSNR and SSIM with stronger attack higher MAE and MR.

Table 3: Evaluation of attacks using the FIDTM model across different density regimes on UCF-QNRF. Higher is better ( $\uparrow$ ).

| (a) Overall          |                |               |                 |                 | (b) Sparse (<100)    |                |               |                 |                 |
|----------------------|----------------|---------------|-----------------|-----------------|----------------------|----------------|---------------|-----------------|-----------------|
| Method               | MAE $\uparrow$ | MR $\uparrow$ | SSIM $\uparrow$ | PSNR $\uparrow$ | Method               | MAE $\uparrow$ | MR $\uparrow$ | SSIM $\uparrow$ | PSNR $\uparrow$ |
| Clean                | 279.08         | 18.73         | N/A             | N/A             | Clean                | 16.50          | 20.34         | N/A             | N/A             |
| DI <sup>2</sup> FGSM | 532.50         | 33.01         | 0.77            | 18.73           | DI <sup>2</sup> FGSM | 11.00          | 13.74         | 0.81            | 20.00           |
| Admix                | 520.34         | 32.03         | 0.78            | 18.75           | Admix                | 12.33          | 15.46         | 0.81            | 20.05           |
| FIA                  | 520.28         | 31.87         | 0.77            | 18.72           | FIA                  | 12.00          | 14.27         | 0.81            | 19.99           |
| PAP                  | 296.00         | 20.17         | 0.95            | 24.28           | PAP                  | 16.50          | 20.53         | 0.95            | 26.30           |
| SVRE                 | 530.57         | 32.74         | 0.77            | 18.72           | SVRE                 | 10.50          | 13.23         | 0.81            | 19.99           |
| GRA                  | 518.30         | 31.63         | 0.78            | 18.74           | GRA                  | 10.67          | 13.12         | 0.81            | 20.02           |
| L2T                  | 521.98         | 32.19         | 0.78            | 18.77           | L2T                  | 11.00          | 13.64         | 0.81            | 20.05           |
| GE-AdvGAN            | 502.39         | 32.27         | 0.84            | 22.86           | GE-AdvGAN            | 8.17           | 10.74         | 0.86            | 23.28           |
| DiffAttack           | 893.02         | 71.66         | 0.49            | 11.34           | DiffAttack           | 30.00          | 36.16         | 0.55            | 11.89           |
| <b>Ours (P2PNet)</b> | 632.00         | 51.72         | 0.82            | 19.35           | <b>Ours (P2PNet)</b> | 18.83          | 23.93         | 0.78            | 18.64           |
| <b>Ours (SASNet)</b> | 741.65         | 61.39         | 0.79            | 17.93           | <b>Ours (SASNet)</b> | 24.33          | 30.42         | 0.75            | 17.10           |

  

| (c) Moderate (100–1000) |                |               |                 |                 | (d) Dense (>1000)    |                |               |                 |                 |
|-------------------------|----------------|---------------|-----------------|-----------------|----------------------|----------------|---------------|-----------------|-----------------|
| Method                  | MAE $\uparrow$ | MR $\uparrow$ | SSIM $\uparrow$ | PSNR $\uparrow$ | Method               | MAE $\uparrow$ | MR $\uparrow$ | SSIM $\uparrow$ | PSNR $\uparrow$ |
| Clean                   | 73.32          | 15.69         | N/A             | N/A             | Clean                | 773.03         | 25.66         | N/A             | N/A             |
| DI <sup>2</sup> FGSM    | 128.05         | 25.50         | 0.80            | 19.32           | DI <sup>2</sup> FGSM | 1503.80        | 51.68         | 0.72            | 17.26           |
| Admix                   | 122.70         | 24.61         | 0.80            | 19.35           | Admix                | 1474.99        | 50.34         | 0.72            | 17.28           |
| FIA                     | 122.25         | 24.46         | 0.80            | 19.32           | FIA                  | 1475.84        | 50.21         | 0.72            | 17.26           |
| PAP                     | 81.07          | 17.36         | 0.94            | 24.15           | PAP                  | 812.33         | 26.65         | 0.95            | 24.44           |
| SVRE                    | 127.72         | 25.24         | 0.80            | 19.32           | SVRE                 | 1498.07        | 51.39         | 0.72            | 17.26           |
| GRA                     | 121.43         | 24.21         | 0.80            | 19.34           | GRA                  | 1471.11        | 50.06         | 0.72            | 17.27           |
| L2T                     | 124.05         | 24.87         | 0.80            | 19.36           | L2T                  | 1477.46        | 50.38         | 0.72            | 17.29           |
| GE-AdvGAN               | 130.76         | 26.59         | 0.85            | 23.21           | GE-AdvGAN            | 1395.88        | 46.87         | 0.82            | 22.01           |
| DiffAttack              | 308.53         | 64.74         | 0.53            | 11.70           | DiffAttack           | 2320.09        | 90.29         | 0.41            | 10.45           |
| <b>Ours (P2PNet)</b>    | 229.62         | 48.47         | 0.82            | 19.57           | <b>Ours (P2PNet)</b> | 1604.69        | 61.11         | 0.81            | 18.90           |
| <b>Ours (SASNet)</b>    | 273.96         | 57.52         | 0.80            | 18.14           | <b>Ours (SASNet)</b> | 1872.53        | 72.45         | 0.78            | 17.50           |

## Adversarial Examples

Below are some of the adversarial examples and perturbations shown in Figure 1 that are generated using our proposed method.

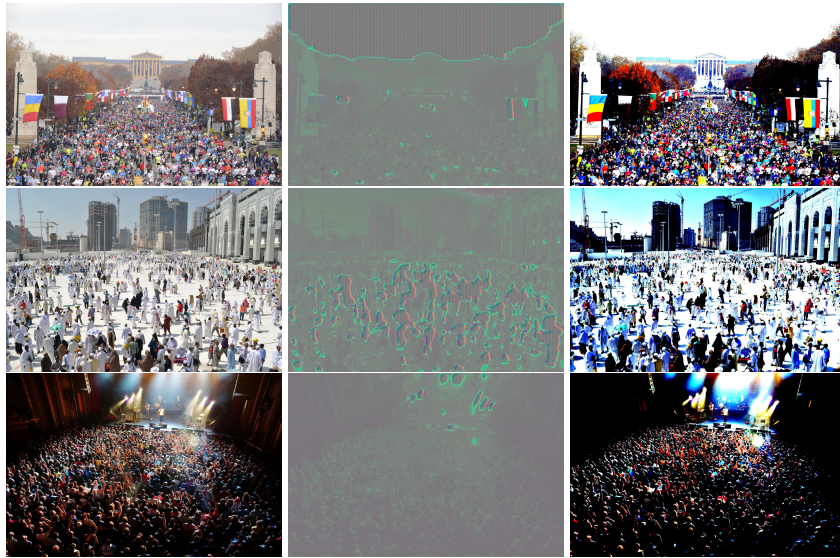

Figure 1: Left: Clean Image, Middle: Perturbation, Right: Adversarial Image

## Benchmark Examples Comparison

Below we compare adversarial examples generated from our image with DiffAttack and PAP for qualitative comparison in Figure 2.

## Implementation Codes

The code for implementing the attack described in the paper is included, full code will be released upon acceptance and publication.

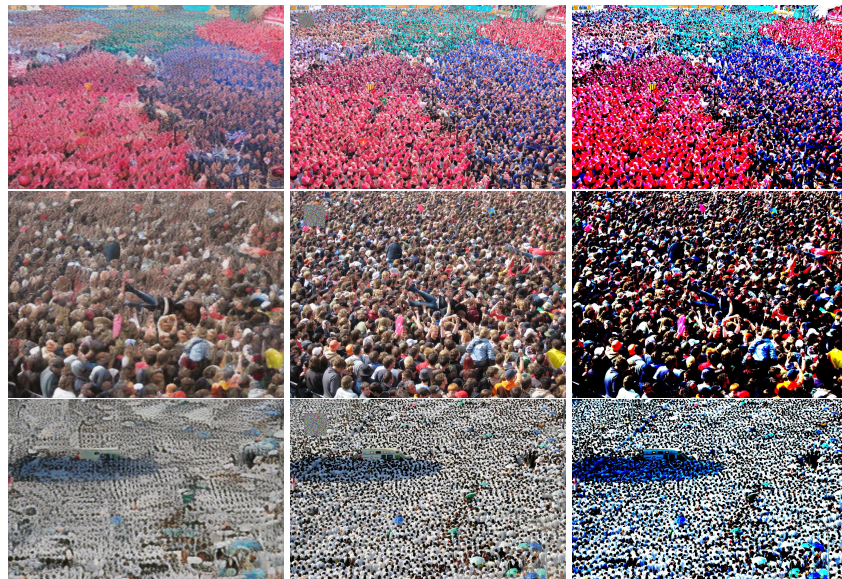

Figure 2: Left: DiffAttack, Middle: PAP, Right: Ours
